# Supplementary material
Source: Springer Nature journal article supplement (https://www.springermedizin.de/resource/supplementary/12958_2009_596_MOESM9_ESM.pdf/9568058)

**A**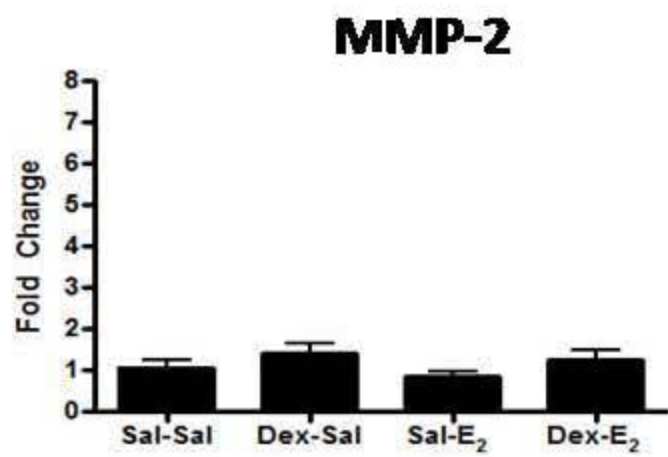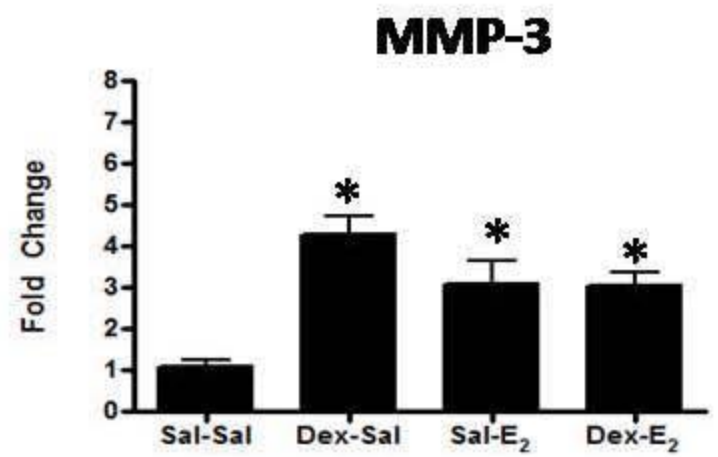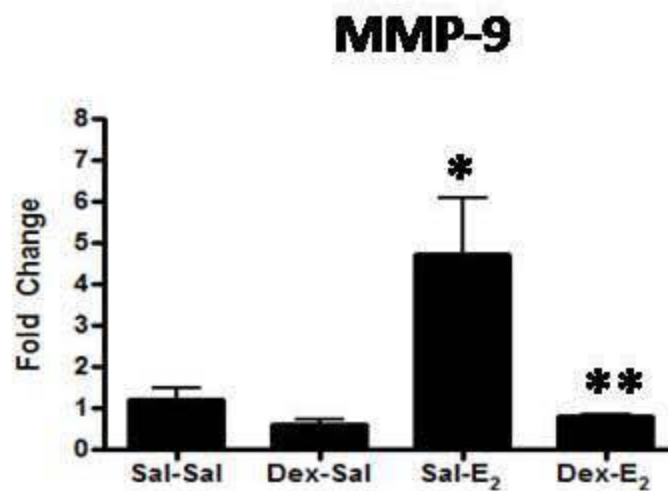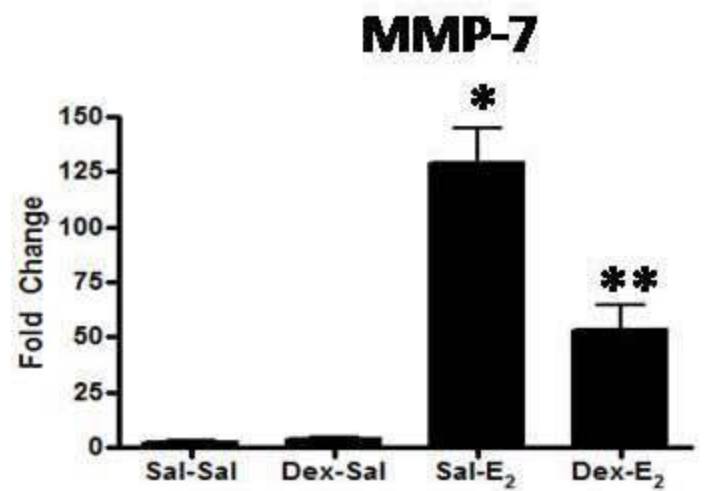**B****MMP-2**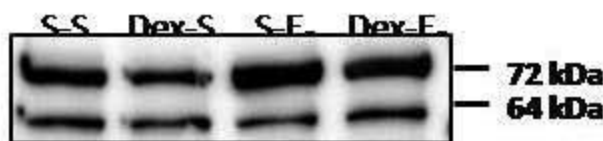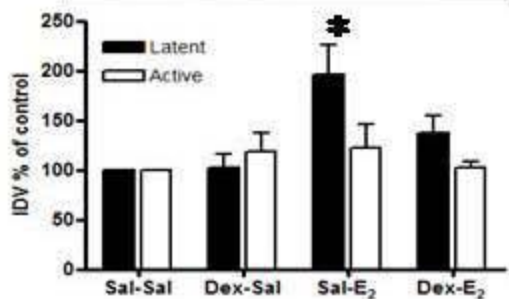**MMP-3**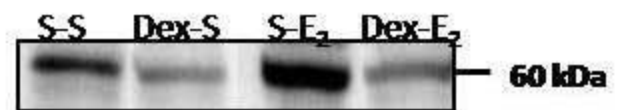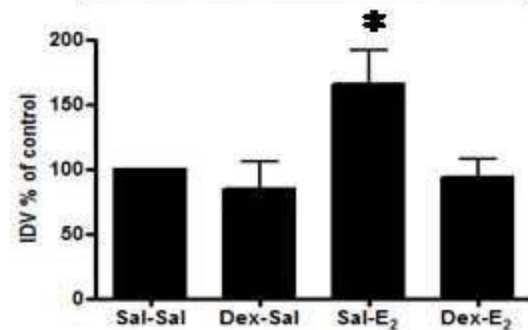**MMP-9**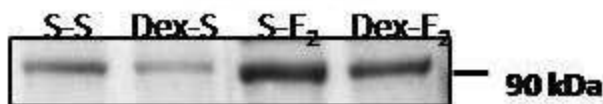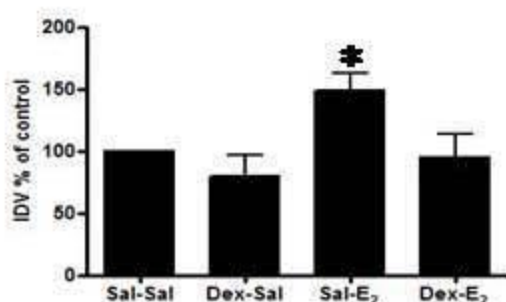**MMP-7**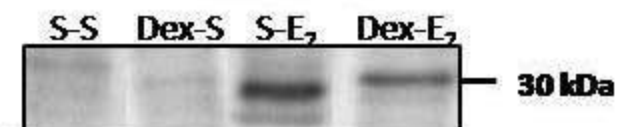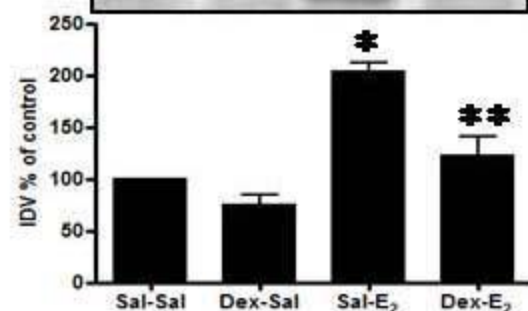**β-actin**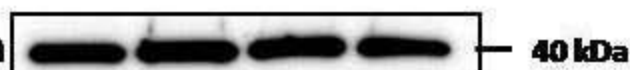

Supplement: MOESM9 [file 9568058]
